# Supplementary material for: Exploring the Relationship between Mediterranean Diet Adherence and Subjective Well-Being among Greek and Cypriot Adults
Source: MDPI journal article supplement (doi:10.3390/nu16081238), 2024-04-21
Supplement: s1 [file s1]

**Table S1: Additional lifestyle factors according to the 14-MEDAS score groups**

|                 |                                                                           | 14-MEDAS_Groups |       |              |       |            |       |
|-----------------|---------------------------------------------------------------------------|-----------------|-------|--------------|-------|------------|-------|
|                 |                                                                           | Low (<5)        |       | Medium (6-9) |       | High (>10) |       |
|                 |                                                                           | N               | %     | N            | %     | N          | %     |
| Sport frequency |                                                                           |                 |       |              |       |            |       |
|                 | Never                                                                     | 59              | 31.1% | 96           | 13.7% | 0          | 0.0%  |
|                 | Occasionally, but not regularly                                           | 58              | 30.5% | 228          | 32.5% | 14         | 31.8% |
|                 | Regularly, less than 150 minutes per week                                 | 38              | 20.0% | 160          | 22.8% | 12         | 27.3% |
|                 | Regularly, 150 minutes or more per week                                   | 35              | 18.4% | 217          | 31.0% | 18         | 40.9% |
| Daily activity  |                                                                           |                 |       |              |       |            |       |
|                 | I normally sit down and I don't walk very much                            | 104             | 19.4% | 403          | 75.3% | 28         | 5.2%  |
|                 | I spend some time walking but I don't make any strenuous effort           | 61              | 20.6% | 223          | 75.3% | 12         | 4.1%  |
|                 | I spend quite a lot of time walking and I make frequent strenuous efforts | 21              | 24.4% | 62           | 72.1% | 3          | 3.5%  |
|                 | I make a lot of strenuous efforts, hard work, and activity                | 3               | 20.0% | 11           | 73.3% | 1          | 6.7%  |
| Nighttime sleep |                                                                           |                 |       |              |       |            |       |
|                 | Less than six hours per night                                             | 41              | 21.6% | 124          | 17.7% | 4          | 9.1%  |
|                 | Six to seven hours per night                                              | 73              | 38.4% | 340          | 48.6% | 21         | 47.7% |
|                 | Seven to eight hours per night                                            | 55              | 28.9% | 196          | 28.0% | 16         | 36.4% |
|                 | Eight to ten hours per night                                              | 20              | 10.5% | 37           | 5.3%  | 3          | 6.8%  |
|                 | More than ten hours per night                                             | 1               | 0.5%  | 2            | 0.3%  | 0          | 0.0%  |
| Siesta          |                                                                           |                 |       |              |       |            |       |
|                 | No                                                                        | 107             | 20.5% | 392          | 75.0% | 24         | 4.6%  |
|                 | Yes, occasionally                                                         | 59              | 19.8% | 228          | 76.5% | 11         | 3.7%  |
|                 | Yes, frequently                                                           | 24              | 20.9% | 82           | 71.3% | 9          | 7.8%  |

**Table S2: Description of PCA Factors (top 5) vs 14-MEDAS score for Male and Female participants**

|                     | 14-MEDAS_Groups |              |           |              |              |              |           |              |            |              |           |              |
|---------------------|-----------------|--------------|-----------|--------------|--------------|--------------|-----------|--------------|------------|--------------|-----------|--------------|
|                     | Low (<5)        |              |           |              | Medium (6-9) |              |           |              | High (>10) |              |           |              |
|                     | Male            |              | Female    |              | Male         |              | Female    |              | Male       |              | Female    |              |
|                     | Mean ± SD       | Median (IQR) | Mean ± SD | Median (IQR) | Mean ± SD    | Median (IQR) | Mean ± SD | Median (IQR) | Mean ± SD  | Median (IQR) | Mean ± SD | Median (IQR) |
| Satisfied with life | 6.8 ± 2.1       | 7 (2)        | 6.9 ± 2.0 | 8 (3)        | 7.4 ± 1.6    | 8 (1)        | 7.2 ± 1.8 | 8 (2)        | 8.4 ± 1.0  | 8 (1)        | 8.2 ± 1.2 | 8 (1)        |
| Life worthwhile     | 7.2 ± 2.0       | 7 (1)        | 7.2 ± 1.7 | 7 (3)        | 7.6 ± 1.7    | 8 (2)        | 7.6 ± 1.7 | 8 (2)        | 8.8 ± 0.6  | 9 (1)        | 8.8 ± 0.9 | 9 (1)        |
| Feeling happy       | 6.8 ± 2.3       | 8 (2)        | 6.4 ± 2.1 | 7 (2)        | 7.0 ± 1.9    | 7 (2)        | 6.8 ± 2.0 | 7 (2)        | 8.5 ± 0.8  | 8 (1)        | 7.9 ± 1.4 | 8 (2)        |
| Feeling worried     | 4.9 ± 2.8       | 5 (4)        | 6.0 ± 2.5 | 6 (4)        | 5.1 ± 2.5    | 5 (4)        | 5.7 ± 2.6 | 6 (4)        | 4.1 ± 3.0  | 3 (5)        | 4.2 ± 2.7 | 4 (4)        |
| Feeling depressed   | 3.2 ± 2.7       | 3 (4)        | 4.4 ± 2.9 | 5 (5)        | 3.0 ± 2.6    | 3 (4)        | 3.9 ± 2.8 | 4 (4)        | 2.0 ± 2.0  | 2 (3)        | 2.3 ± 2.2 | 2 (2)        |

**Figure S1: BMI and SWB items variation of means (SD) in response to 14-MEDAS groups.**

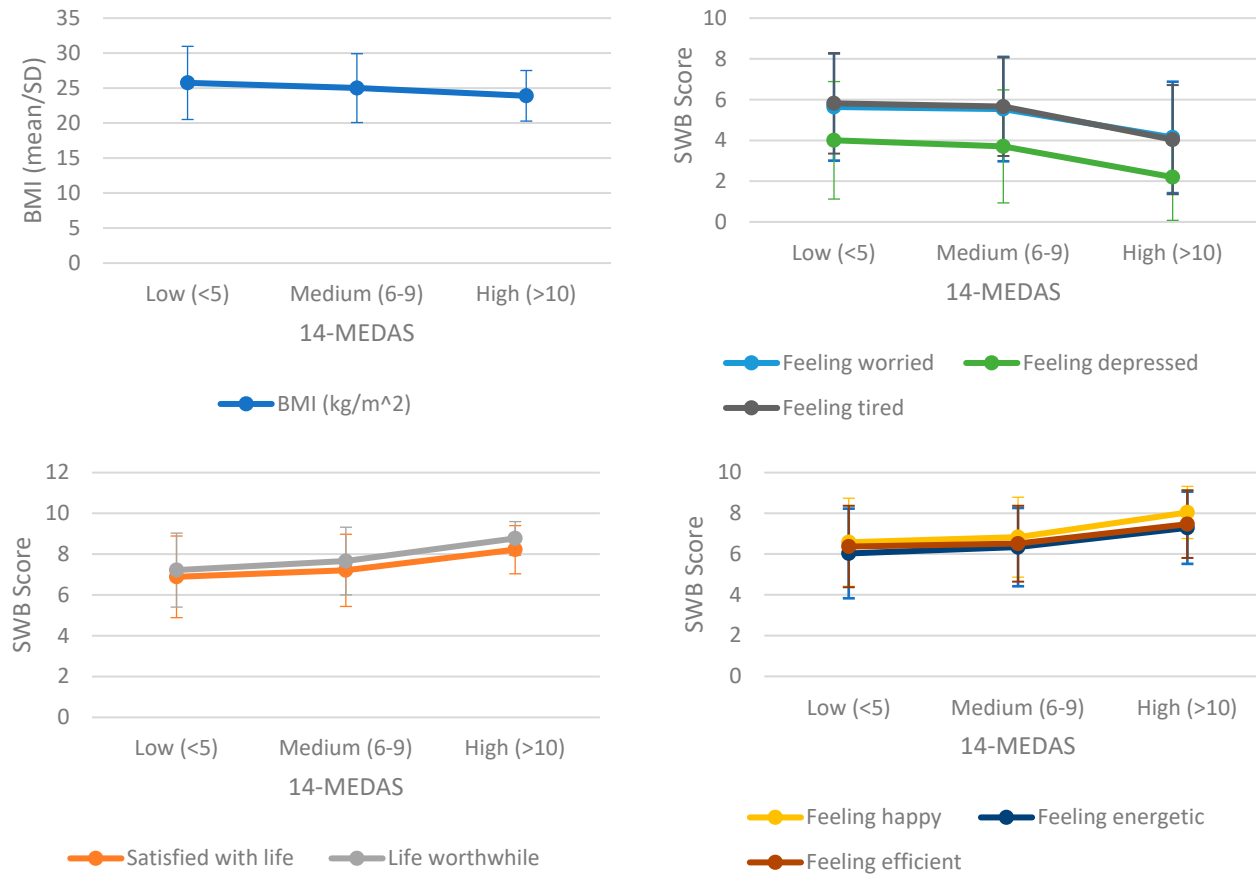

Figure S2: Normality test (histograms).

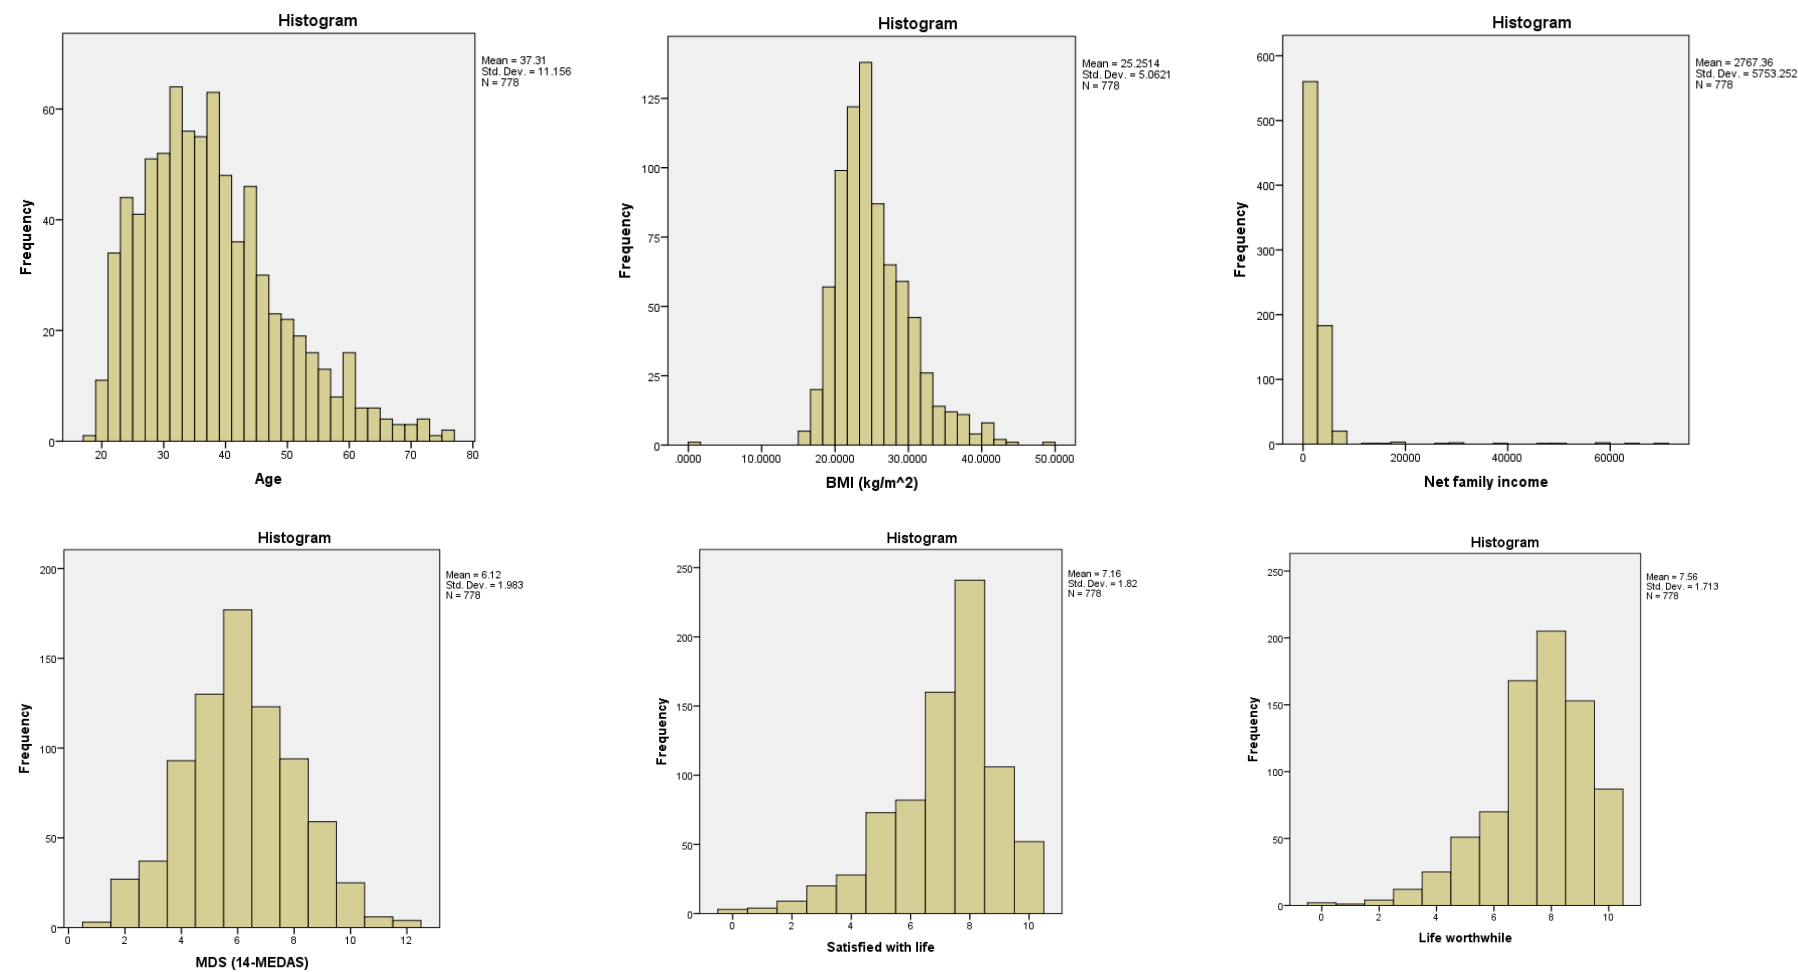

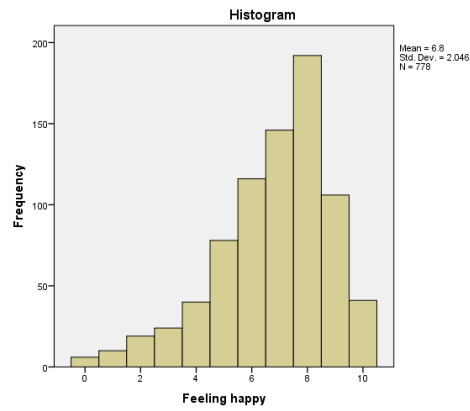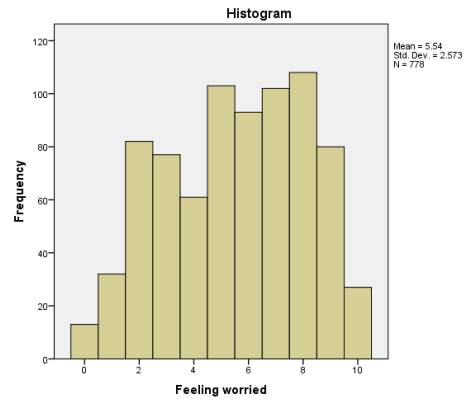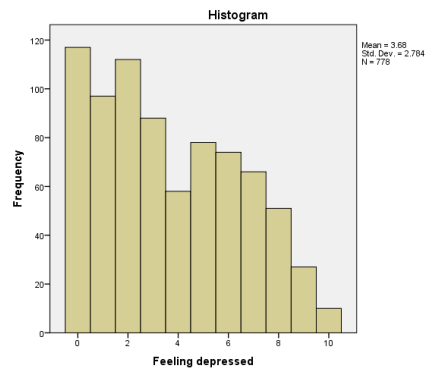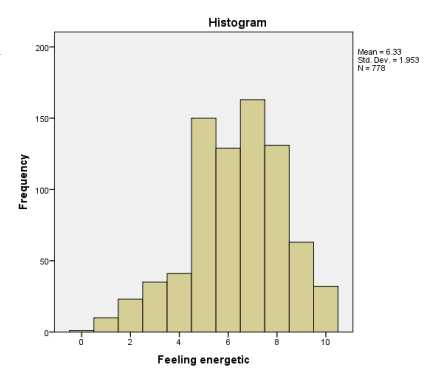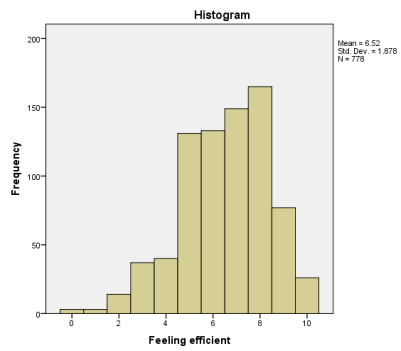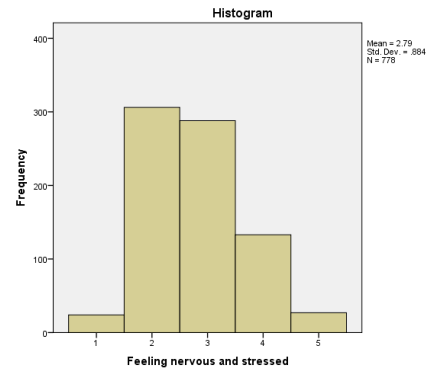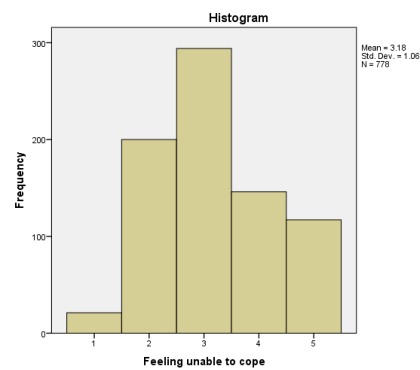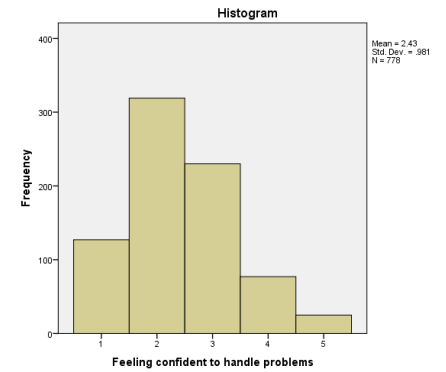

Table S3: Normality test (Shapiro-Wilk test).

|                                      | Shapiro-Wilk |     |       |
|--------------------------------------|--------------|-----|-------|
|                                      | Statistic    | df  | Sig.  |
| Age                                  | 0.955        | 778 | <0.05 |
| BMI (kg/m^2)                         | 0.938        | 778 | <0.05 |
| Net family income                    | 0.281        | 778 | <0.05 |
| MDS (14-MEDAS)                       | 0.976        | 778 | <0.05 |
| Satisfied with life                  | 0.916        | 778 | <0.05 |
| Life worthwhile                      | 0.920        | 778 | <0.05 |
| Feeling happy                        | 0.928        | 778 | <0.05 |
| Feeling worried                      | 0.956        | 778 | <0.05 |
| Feeling depressed                    | 0.932        | 778 | <0.05 |
| Feeling energetic                    | 0.961        | 778 | <0.05 |
| Feeling efficient                    | 0.956        | 778 | <0.05 |
| Feeling tired                        | 0.965        | 778 | <0.05 |
| Feeling nervous and stressed         | 0.867        | 778 | <0.05 |
| Feeling unable to cope               | 0.891        | 778 | <0.05 |
| Feeling confident to handle problems | 0.887        | 778 | <0.05 |
